# Supplementary material for: Manual para saír da capoeira: Sobre o "Don Hamlet" de Alvaro Cunqueiro
Source: MDPI journal article supplement (doi:10.3390/polym15153208), 2011-01-01
Supplement: s1 [file s1]

# **Evaluation of Physico-mechanical Properties and Thermal Conduction to Energy-saving Effects of Wood Compression Layered Structural materials**

Yu-Hui Chen<sup>1#</sup>, Shang-Tse Ho<sup>1#</sup>, and Han-Chien Lin<sup>1,\*</sup>

<sup>1</sup> Department of Wood Based Materials and Design, National Chiayi University, Chiayi 600, Taiwan.

\* Correspondence: alexhlin@mail.ncyu.edu.tw; Tel.: +886-5-271-7100; Han-Chien Lin

# These authors contributed equally to the work.

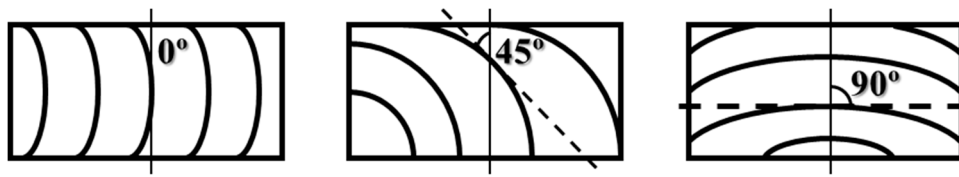

**Figure S1.** Japanese cedar boards were divided into three groups using different annual ring angle.

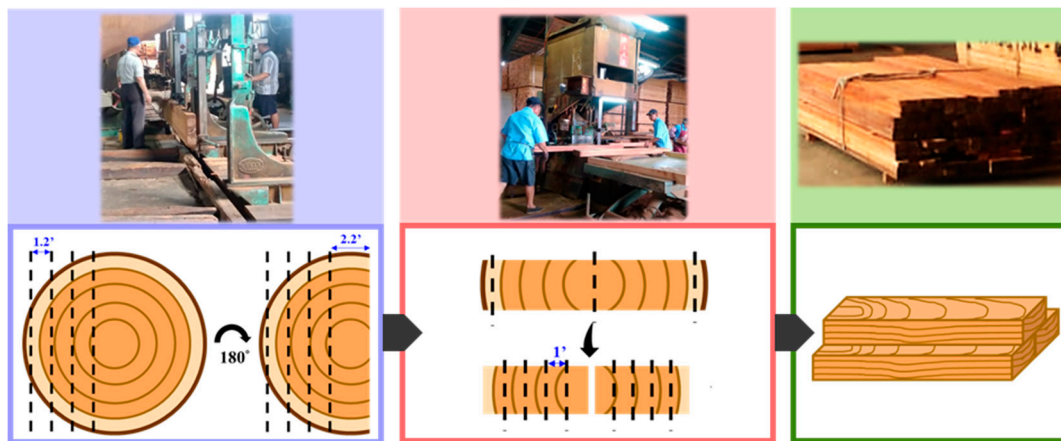

**Figure S2.** Specimen processing.

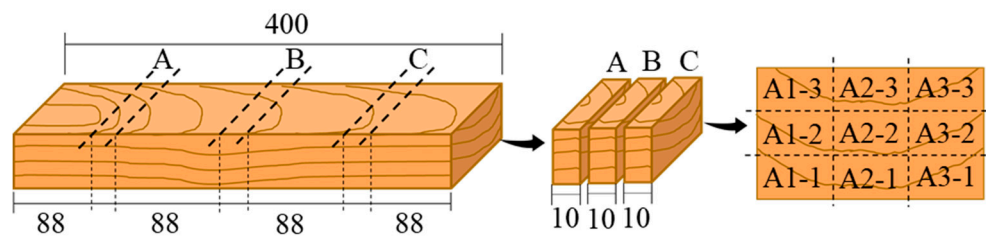

**Figure S3.** Sampling method of test specimens.

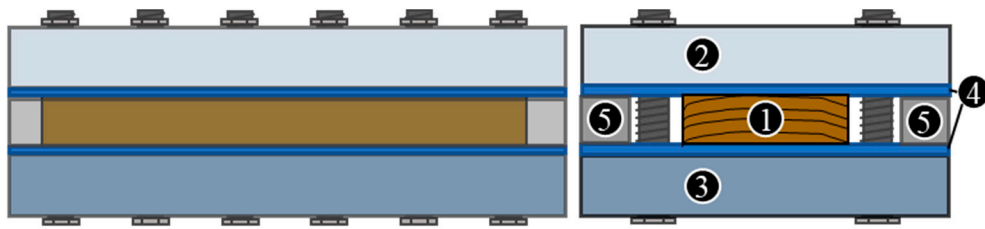

- ❶ WCLS specimens ; ❷ Iron plates with threaded holes
- ❸ Iron plates with non-threaded holes ; ❹ Stainless plate
- ❺ Stop bar with thickness 18 mm

**Figure S4.** Method of fixed specimen.

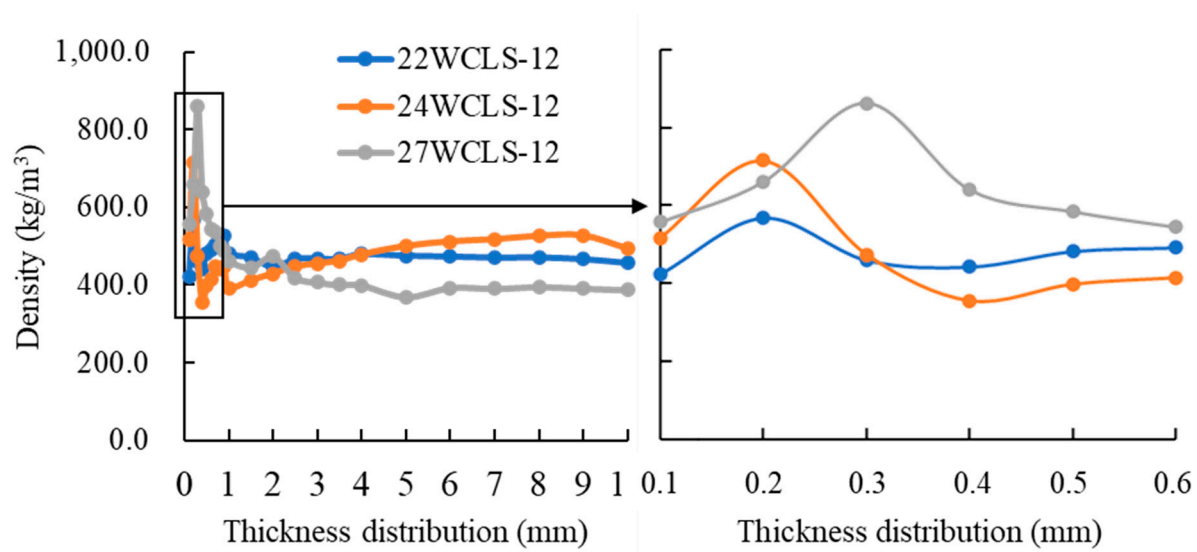

**Figure S5.** Density profile of WCLS.

**Table S1** Moisture content, density, compression-set and weight loss of specimens with different manufacturing conditions

| Development conditions | Moisture content (%)        | Compression-set rate (%) | Density (kg/m <sup>3</sup> ) | Weight loss (%)          |
|------------------------|-----------------------------|--------------------------|------------------------------|--------------------------|
| 18JC                   | 10.78 (0.56) <sup>a1)</sup> | -                        | 386.33 (0.04) <sup>ca</sup>  | -                        |
| 22WCLS-12              | 6.13 (0.66) <sup>b</sup>    | 17.96 (0.41)             | 427.39 (0.08) <sup>ab</sup>  | 0.88 (0.59) <sup>a</sup> |
| 24WCLS-12              | 5.81 (0.34) <sup>b</sup>    | 24.90 (0.18)             | 449.43 (0.04) <sup>bc</sup>  | 1.02 (0.61) <sup>a</sup> |
| 27WCLS-12              | 5.08 (0.60) <sup>b</sup>    | 33.22 (0.25)             | 506.98 (0.05) <sup>c</sup>   | 1.23 (0.84) <sup>a</sup> |

<sup>1)</sup> Average (SD). Letters are the test results of Duncan's single factor variance at the significance level of 5%. The same lowercase letters mean that there is no significant difference in between the development conditions and the measurement items.

**Table S2** Water absorption percent, volumetric swelling coefficient and antismelling efficiency with different compression-set WCLS

| Development conditions | Cr (%) <sup>1)</sup> | WAP(%)                       | S(%)                       | ASE(%)                     |
|------------------------|----------------------|------------------------------|----------------------------|----------------------------|
| 22CW180-60             |                      | 202.78 (9.43) <sup>a2)</sup> | 27.17 (3.63) <sup>ha</sup> | -                          |
| 22WCLS-6               | 17.96                | 198.33 (3.62) <sup>ab</sup>  | 17.22 (3.62) <sup>b</sup>  | 34.38 (13.33) <sup>a</sup> |
| 22WCLS-12              |                      | 188.77 (7.56) <sup>bc</sup>  | 18.55 (2.49) <sup>b</sup>  | 36.46 (6.83) <sup>a</sup>  |
| 22WCLS-24              |                      | 178.77 (3.62) <sup>c</sup>   | 16.48 (2.56) <sup>b</sup>  | 39.32 (9.43) <sup>a</sup>  |
| 24CW180-60             |                      | 185.46 (2.89) <sup>a</sup>   | 28.63 (1.88) <sup>a</sup>  | -                          |
| 24WCLS-6               | 24.90                | 170.48 (1.05) <sup>b</sup>   | 23.72 (1.00) <sup>b</sup>  | 15.67 (3.30) <sup>a</sup>  |
| 24WCLS-12              |                      | 178.37 (5.97) <sup>c</sup>   | 26.78 (3.33) <sup>ac</sup> | 16.07 (6.77) <sup>a</sup>  |
| 24WCLS-24              |                      | 178.90 (3.13) <sup>c</sup>   | 24.68 (1.18) <sup>bc</sup> | 18.78 (4.12) <sup>a</sup>  |
| 27CW180-60             |                      | 177.22 (6.35) <sup>a</sup>   | 29.04 (7.47) <sup>a</sup>  | -                          |
| 27WCLS-6               | 33.22                | 176.03 (9.51) <sup>a</sup>   | 27.33 (2.14) <sup>a</sup>  | 8.20 (5.18) <sup>a</sup>   |
| 27WCLS-12              |                      | 169.28 (5.30) <sup>a</sup>   | 23.72 (1.00) <sup>a</sup>  | 13.20 (15.11) <sup>a</sup> |
| 27WCLS-24              |                      | 173.73 (5.00) <sup>a</sup>   | 27.88 (7.04) <sup>a</sup>  | 12.59 (27.08) <sup>a</sup> |

<sup>1)</sup> Compression-set rate (Cr)

<sup>2)</sup> Average (SD). Columns with different letters indicate significant differences ( $p < 0.05$ ).



**Table S3** Equivalent moisture content and moisture excluding efficiency with different compression thickness wood compression layered structural materials

| Development conditions | Cr (%) <sup>1)</sup> | 40°C, 65%RH                |                            | 40°C, 95%RH               |                            |
|------------------------|----------------------|----------------------------|----------------------------|---------------------------|----------------------------|
|                        |                      | EMC(%)                     | MEE(%)                     | EMC(%)                    | MEE(%)                     |
| 22CW180-60             | 17.96                | 6.51 (0.16) <sup>a2)</sup> | -                          | 16.42 (1.06) <sup>a</sup> | -                          |
| 22WCLS-6               |                      | 6.46 (0.70) <sup>a</sup>   | 7.94 (5.79) <sup>a</sup>   | 16.54 (0.37) <sup>a</sup> | 2.65 (2.36) <sup>a</sup>   |
| 22WCLS-12              |                      | 5.71 (0.51) <sup>b</sup>   | 17.81 (7.58) <sup>ab</sup> | 13.93 (1.55) <sup>b</sup> | 19.25 (3.32) <sup>b</sup>  |
| 22WCLS-24              |                      | 5.04 (0.68) <sup>b</sup>   | 29.64 (5.69) <sup>b</sup>  | 13.87 (0.88) <sup>b</sup> | 18.77 (7.31) <sup>b</sup>  |
| 22CW180-60             | 24.90                | 7.53 (0.67) <sup>a</sup>   | -                          | 18.69 (5.37) <sup>a</sup> | -                          |
| 22WCLS-6               |                      | 6.58 (0.28) <sup>b</sup>   | 14.44 (4.86) <sup>a</sup>  | 16.76 (0.75) <sup>a</sup> | 11.67 (5.04) <sup>a</sup>  |
| 24WCLS-12              |                      | 6.46 (0.51) <sup>b</sup>   | 17.16 (9.63) <sup>a</sup>  | 15.69 (1.09) <sup>a</sup> | 19.58 (8.31) <sup>b</sup>  |
| 24WCLS-24              |                      | 6.14 (1.00) <sup>b</sup>   | 25.47 (4.42) <sup>a</sup>  | 16.51 (0.16) <sup>a</sup> | 13.18 (1.11) <sup>ab</sup> |
| 22CW180-60             | 33.22                | 6.44 (0.46) <sup>a</sup>   | -                          | 15.01 (0.25) <sup>a</sup> | -                          |
| 27WCLS-6               |                      | 5.12 (0.46) <sup>b</sup>   | 16.76 (3.54) <sup>a</sup>  | 13.67 (0.88) <sup>b</sup> | 10.16 (7.55) <sup>a</sup>  |
| 27WCLS-12              |                      | 6.17 (1.07) <sup>a</sup>   | 17.27 (3.77) <sup>a</sup>  | 12.66 (4.26) <sup>b</sup> | 15.18 (1.11) <sup>a</sup>  |
| 27WCLS-24              |                      | 5.82 (0.26) <sup>ab</sup>  | 13.50 (2.37) <sup>a</sup>  | 15.30 (1.49) <sup>b</sup> | 12.76 (1.87) <sup>a</sup>  |

<sup>1)</sup> Compression-set rate (Cr)

<sup>2)</sup> Average (SD). Columns with different letters indicate significant differences ( $p < 0.05$ ).

**Table S4** Modulus of rupture and Modulus of elasticity of different compression-set rate WCLS

| Development conditions <sup>2)</sup> | Cr (%) <sup>1)</sup> | MOR (MPa)                   | Increase rate (%) | MOE (GPa)                | Increase rate (%) |
|--------------------------------------|----------------------|-----------------------------|-------------------|--------------------------|-------------------|
| 18JC                                 | 0                    | 51.84 (4.40) <sup>a2)</sup> | -                 | 4.99 (0.39) <sup>a</sup> | -                 |
| 22WCLS-12                            | 17.96                | 52.14 (7.22) <sup>a</sup>   | 9.98 (9.71)       | 5.50 (1.03) <sup>a</sup> | 9.87 (11.92)      |
| 24WCLS-12                            | 24.90                | 56.22 (8.76) <sup>a</sup>   | 13.39 (20.61)     | 5.86 (0.90) <sup>a</sup> | 17.37 (18.03)     |
| 27WCLS-12                            | 33.22                | 61.06 (6.66) <sup>a</sup>   | 20.87 (13.09)     | 6.11 (0.90) <sup>a</sup> | 22.40 (17.97)     |

<sup>1)</sup> Compression-set rate (Cr).

<sup>2)</sup> Average (SD). Columns with different letters indicate significant differences ( $p < 0.05$ ).

**Table S5** Surface hardness of different compression -set WCLS

| Development<br>confitions | Cr (%) <sup>1)</sup> | Density (kg/m <sup>3</sup> ) | Hardness<br>(N/mm <sup>2</sup> ) | Increase rate<br>(%) |
|---------------------------|----------------------|------------------------------|----------------------------------|----------------------|
| 18JC                      | 0                    | 386.33 (0.04) <sup>a</sup>   | 5.60 (0.65) <sup>a2)</sup>       | -                    |
| 22WCLS-12                 | 17.96                | 427.39 (0.08) <sup>ab</sup>  | 6.73 (0.44) <sup>a</sup>         | 20.09 (7.84)         |
| 24WCLS-12                 | 24.90                | 449.43 (0.04) <sup>bc</sup>  | 8.54 (0.54) <sup>b</sup>         | 30.85 (9.65)         |
| 27WCLS-12                 | 33.22                | 506.98 (0.05) <sup>c</sup>   | 9.57 (1.48) <sup>b</sup>         | 40.22 (9.92)         |

<sup>1)</sup> Compression-set rate (Cr)

<sup>2)</sup> Average (SD). Columns with different letters indicate significant differences ( $p < 0.05$ ).

**Table S6** Thermal conductivity of WCLS

| development condition | Cr (%) <sup>1)</sup> | Moisture content (%)        | Density (kg/m <sup>3</sup> ) | Thermal conductivity (W/mK)  |
|-----------------------|----------------------|-----------------------------|------------------------------|------------------------------|
| 18JC                  | 0                    | 10.78 (0.56) <sup>a2)</sup> | 386.33 (0.04) <sup>a</sup>   | 0.1863 (0.0071) <sup>a</sup> |
| 22WCLS-12             | 17.96                | 6.13 (0.66) <sup>b</sup>    | 427.39 (0.08) <sup>ab</sup>  | 0.1520 (0.0147) <sup>b</sup> |
| 24WCLS-12             | 24.90                | 5.81 (0.34) <sup>b</sup>    | 449.43 (0.04) <sup>bc</sup>  | 0.1817 (0.0106) <sup>a</sup> |
| 27WCLS-12             | 33.22                | 5.08 (0.60) <sup>b</sup>    | 506.98 (0.05) <sup>c</sup>   | 0.1423 (0.0137) <sup>b</sup> |

<sup>1)</sup> Compression-set rate (Cr)

<sup>2)</sup> Average (SD). Columns with different letters indicate significant differences ( $p < 0.05$ ).
